# Supplementary material for: Drought-Responsive NAC Transcription Factor RcNAC72 Is Recognized by RcABF4, Interacts with RcDREB2A to Enhance Drought Tolerance in Arabidopsis
Source: MDPI journal article supplement (doi:10.3390/ijms23031755), 2022-02-03
Supplement: s1 [file s1]

## Supplementary Figure S1-S4:

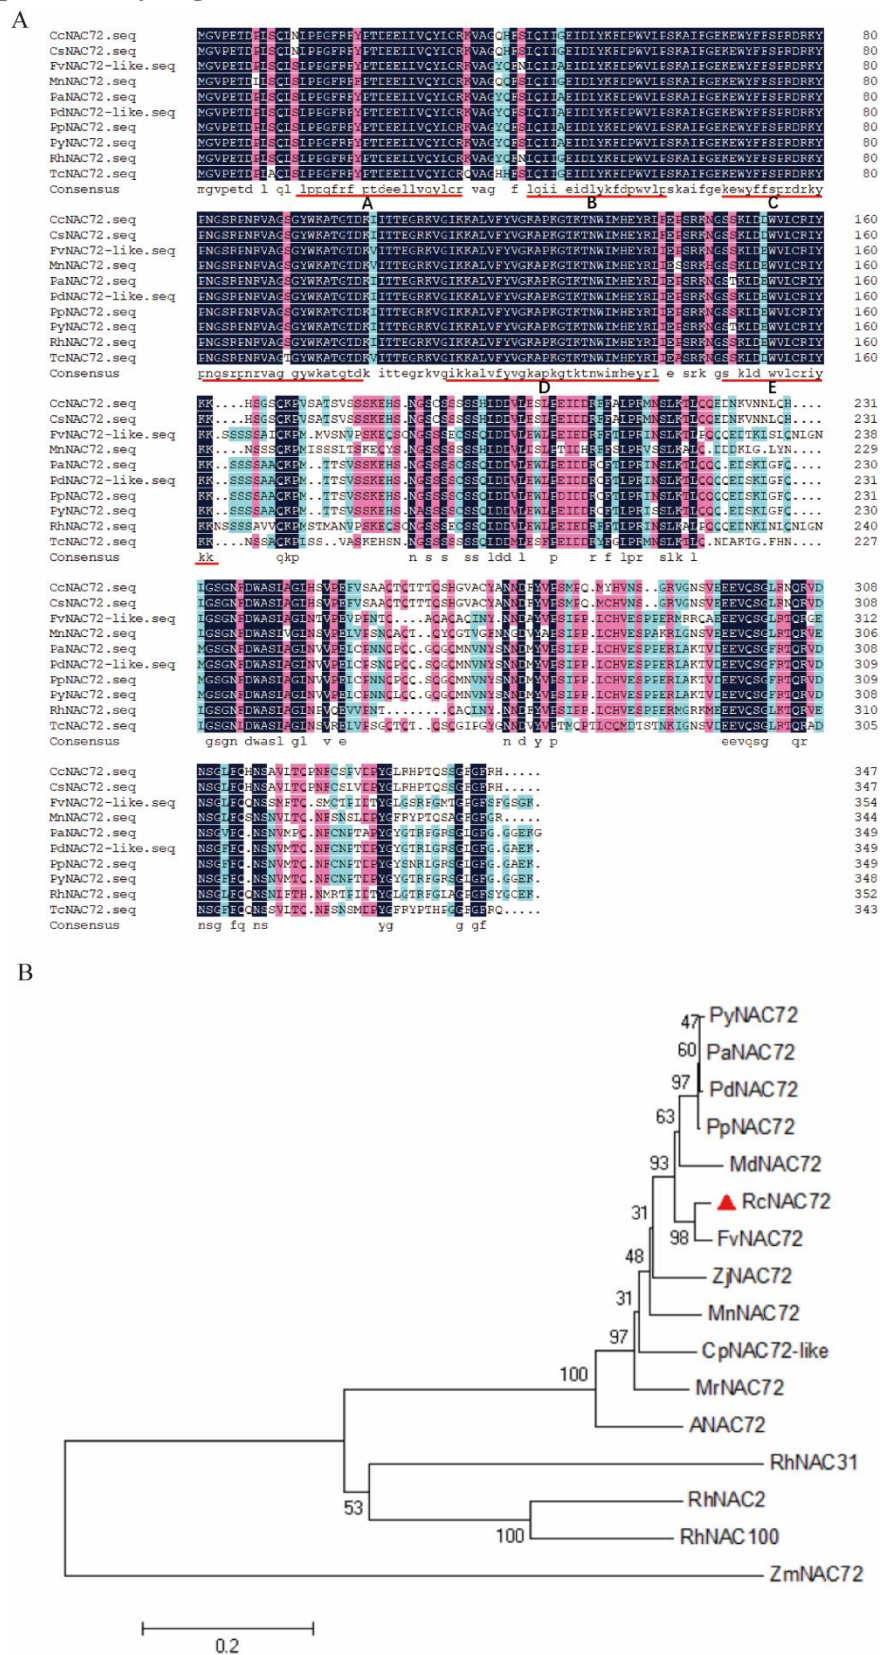

**Figure S1. Multiple sequence alignments and phylogenetic analysis of *RcNAC72*.** (A) Multiple sequence alignment of *RcNAC72*. Red lines indicate the locations of the five highly conserved subdomains A-E. (B) Phylogenetic tree analysis of *RcNAC72*. Protein

sequences used in multiple sequence alignments and phylogenetic tree analysis are shown in Supplementary Table S2.

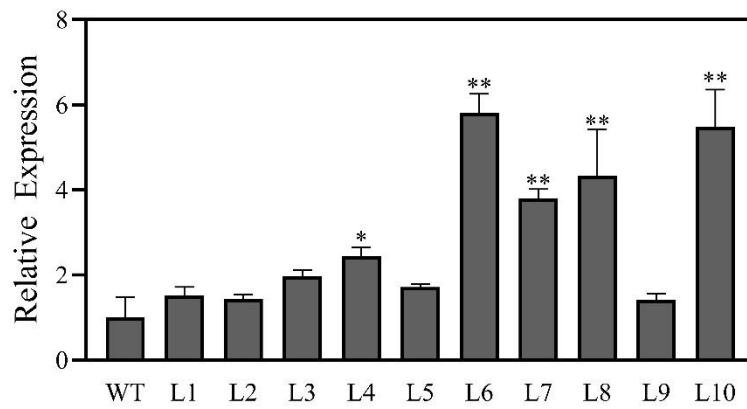

**Figure S2. qRT-PCR screening of *RcNAC72* transgenic *Arabidopsis*.** Three biological replications were performed. The bars show the standard deviation (SD). Asterisks indicate a significant difference \*\* $p < 0.01$  and \* $p < 0.05$  compared with the corresponding controls.

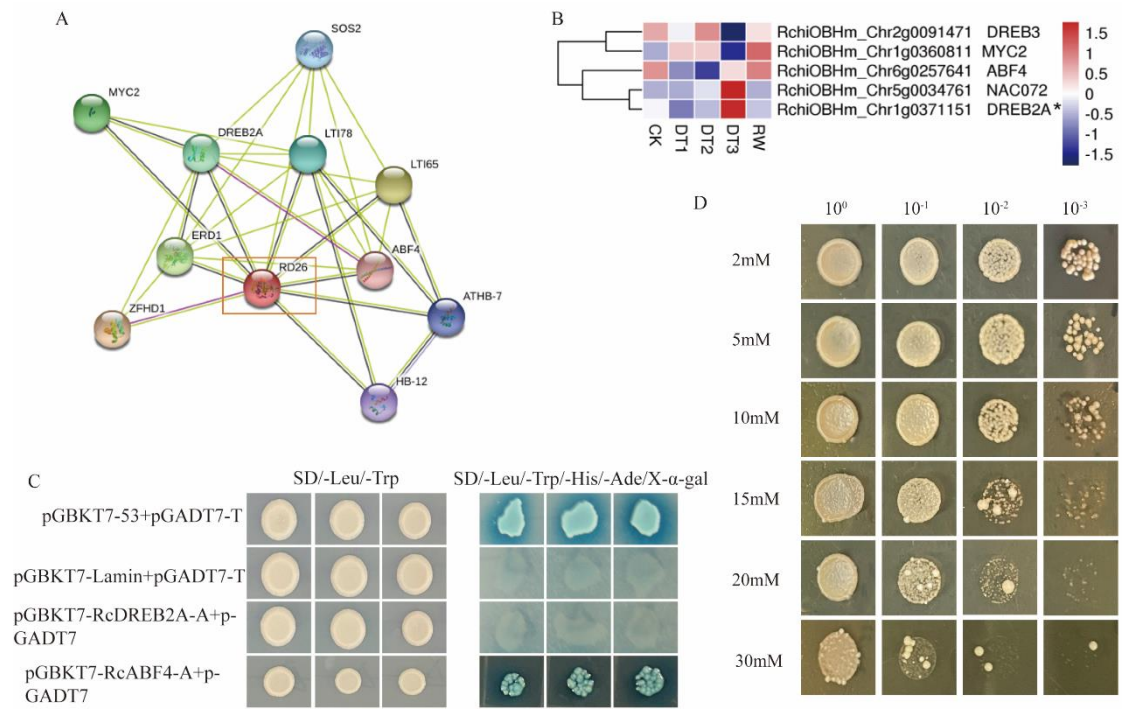

**Figure S3. Screening for genes with possible regulatory relationship with *RcNAC72*.** (A). Network diagram of the presence of regulatory genes in ANAC72 of Arabidopsis. (B). Heat map analysis of drought stress transcriptome expression of genes that may have a regulatory relationship with *RcNAC72*. (C). Transcriptional activation of *RcDREB2A* and *RcABF4*. (D). Screening for 3-AT concentrations that inhibit the transcriptional activation activity of *RcABF4*.

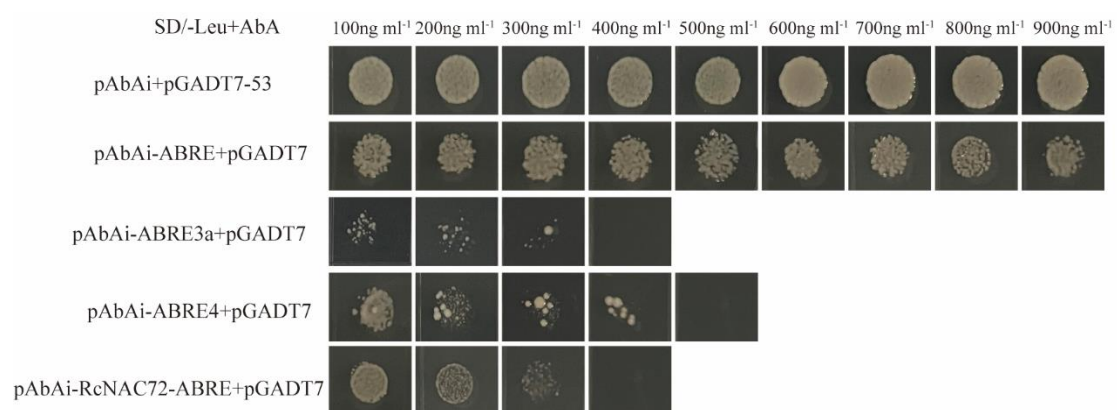

**Figure S4. Test of bait yeast strain for AbAr expression.**

**Supplementary Table S1-S2:****Table S1 Related primers**

| Name of primer          | Primer sequence (5'-3')                                |
|-------------------------|--------------------------------------------------------|
| RcNAC72-F               | ATGGGCGTGCCGGAACCGACCCT                                |
| RcNAC72-R               | TCACTTTTCACAGCCGTAGC                                   |
| RcNAC72-1-F             | GAATCTCGGGTCGGGCA                                      |
| RcNAC72-1-R             | TGGGCTTGGGTATTGGGA                                     |
| RcPP2A-F                | GAGGACAGGACCAGGAAGG                                    |
| RcPP2A-R                | GCTCTACGCCGCCAACAT                                     |
| ProNAC72-F              | TTGATACAGACGGATTGCTACG                                 |
| ProNAC72-R              | TTCTTCTGGTCAGAGCTTGAG                                  |
| pBI121-ProNAC72-1-GUS-F | TTTCTCAAGATCAGA <u>AGTACT</u> TTGACCACTAGCTTTTTACAATTC |
|                         | TCA                                                    |
| pBI121-ProNAC72-1-GUS-R | CATAAGGGACTGACCACCCGGG <u>GATCCT</u> TTCTTCTGGTCAGAGCT |
|                         | TGAGATTT                                               |
| pBI121-ProNAC72-2-GUS-F | TTTCTCAAGATCAGA <u>AGTACT</u> TTGATACAGACGGATTGCTACGT  |
|                         | C                                                      |
| pBI121-ProNAC72-1-GUS-R | CATAAGGGACTGACCACCCGGG <u>GATCCT</u> TTGTGTGTTAAAGAGG  |
|                         | CTGGAGAC                                               |
| pTRV2-RcNAC72-F         | GTGAGTAAGGTTACCGA <u>ATTCC</u> GGTAGGGCAAAAAAAGGAG     |
| pTRV2-RcNAC72-R         | CGTGAGCTCGGTACCGGATCCTTATTGAACAATAAAAGATTGCT           |
|                         | AAATTCT                                                |

pBI121-RcNAC72-GFP-F CATTACGAACGATACTCGAGATGGGCGTGCCGAAACCGACC

C

pBI121-RcNAC72-GFP-R CACCATCACTAGTACGTCGACCTTTTCACAGCCGTAGC

pGBKT7-RcNAC72-A-F CATGGAGGCCGAATTCATGGGCGTGCCGAAAC

pGBKT7-RcNAC72-A-R GCAGGTCGACGGATCCCTTTTCACAGCCGTAGCTGA

pGBKT7-RcNAC72-C-F ATGGAGGCCGAATTCGATGGCAAACGTTCCGA

pGBKT7-RcNAC72-C-R GCAGGTCGACGGATCCCTTTTCACAGCCGTAGCTGA

pGBKT7-RcNAC72-N-F CATGGAGGCCGAATTCATGGGCGTGCCGAAAC

pGBKT7-RcNAC72-N-R GCAGGTCGACGGATCCCTCGACATCGGCTTCTGTACTACTG

pGBKT7-RcDREB2A-F ATGGAGGCCGAATTCATGGGTGCTTATGATCAAGGTTC

pGBKT7-RcDREB2A-R CCGCTGCAGGTCGACGGATCCGTTTGCATTGCCGCCGCA

pGADT7-RcNAC72-F GTACCAGATTACGCTCATATGATGGGCGTGCCGAAACC

pGADT7-RcNAC72-R CAGCTCGAGCTCGATGGATCCCTTTTCACAGCCGTAGCTGAAA

pSPYNE173-RcNAC72-F TGGCGCGCCACTAGTGGATCCATGGGCGTGCCGAAACC

pSPYNE173-RcNAC72-R TTGCTCCATCCCGGGAGCGGTACCCTTTTCACAGCCGTAGCTGA

A

pSPYCE (M)-RcDREB2A-F CCCAGGCCTACTAGTGGATCCATGGGTGCTTATGATCAAGGTTC

pSPYCE (M)-RcDREB2A-R TTCGAGCTCCTACCCGGGAGCGGTACCCTTTGCATTGCCGCCGC

A

pSPYCE (M)-RcABF4-F AGGCCTACTAGTGGATCCATGGGATCTAATATAAACTTCAAGAA

---

|                        |                                                       |
|------------------------|-------------------------------------------------------|
| pSPYCE (M)-RcABF4-R    | GAGCTCCTACCCGGGAGC <u>GGTAC</u> CCCAAGGGCCAGTCAATGTTC |
| pAbAi-ABRE-F           | <u>C</u> ACGTGACGTGACGTG <u>C</u>                     |
| pAbAi-ABRE-R           | <u>TCGAG</u> CACGTCACGTCACGT <u>GGTAC</u>             |
| pAbAi-ABRE3a-F         | <u>C</u> TACGTGTACGTGTACGTG <u>C</u>                  |
| pAbAi-ABRE3a-R         | <u>TCGAG</u> CACGTACACGTACACGTAG <u>GGTAC</u>         |
| pAbAi-ABRE4-R          | <u>CC</u> ACGTACACGTACACGTAC <u>C</u>                 |
| pAbAi-ABRE4-F          | <u>TCGAG</u> TACGTGTACGTGTACGTG <u>GGTAC</u>          |
| pProRcNAC72ABRE-AbAi-F | CTTGAATTTCGAGCTC <u>GGTAC</u> CTCTCTACGTGCCGAATTGACC  |
| pProRcNAC72ABRE-AbAi-R | ATACAGAGCACATGCCT <u>TCGAG</u> GTGAAACGAACCCACGTCCG   |
| AD-RcABF4-F            | GTACCAGATTACGCT <u>CATAT</u> GATGGGATCTAATATAAACTTCAA |
|                        | GAACTATG                                              |
| AD-RcABF4-R            | CAGCTCGAGCTCGAT <u>GGATC</u> CCCAAGGGCCAGTCAATGTTC    |
| AtActin-F              | CTCATGCCATCCTCCGTCTT                                  |
| AtActin-R              | ACTTGCCCATCGGGTAATTC                                  |
| AtRD29A -F             | GAGCAACGAGGGGAAGATAAAAG                               |
| AtRD29A-R              | TCAGTCGCACCACCACCGAACCA                               |
| AtRD29B-F              | CAAAACCAAGCACCTACACA                                  |
| AtRD29B-R              | CTCCTTCACTCCACTTCCAC                                  |
| AtRD20-F               | ATTCGAGCACCTATGACACC                                  |
| AtRD20-R               | AAACTTCCATCAAAGCAACC                                  |

---



|           |                          |
|-----------|--------------------------|
| AtLEA14-F | ACCGGATTTAATTCATTAAGCGCT |
| AtLEA14-R | TCCCAAGCTGGCAGAGGGAAT    |
| AtNCED3-F | GGATTGATGCTCCAGATTG      |
| AtNCED3-R | CGGACGGCGAGTTGATT        |
| AtPP2CA-F | AACGGTGTAGCCATTCC        |
| AtPP2CA-R | ACATCCCATAGTCCATCA       |

---

**Table S2 Accession numbers of genes used in this study**

| Gene name    | Accession number |
|--------------|------------------|
| FvNAC72      | XP_004291667.1   |
| RhNAC2       | AFQ21786.1       |
| RhNAC100     | AFS95065.1       |
| RhNAC31      | MF576436         |
| PdNAC72      | XP_034210680.1   |
| PpNAC72      | XP_020418173.1   |
| PyNAC72      | XP_034210680.1   |
| PaNAC72      | XP_021809122.1   |
| MnNAC72      | XP_010089503.1   |
| MdNAC72      | ADL36797.1       |
| ZjNAC72      | XP_031287408.1   |
| MrNAC72      | KAB1217220.1     |
| CpNAC72-like | XP_021894680.1   |
| AtNAC72      | AT4G27410.2      |
| ZmNAC72      | KJ727003.1       |
| AtRD29A      | NM_124610        |
| AtRD29B      | NM_124609        |
| AtRD20       | NM_128898        |
| AtLEA14      | At1G01470        |
| AtNCED3      | NM_112304.3      |

---

|         |             |
|---------|-------------|
| AtPP2CA | NM_111974.4 |
|---------|-------------|

|         |           |
|---------|-----------|
| AtActin | NM_112764 |
|---------|-----------|

---
